# Supplementary material for: Distinct DNA Methylation Profiles in Ovarian Tumors: Opportunities for Novel Biomarkers
Source: MDPI journal article supplement (doi:10.3390/ijms19061559), 2018-05-24
Supplement: s1 [file s1]

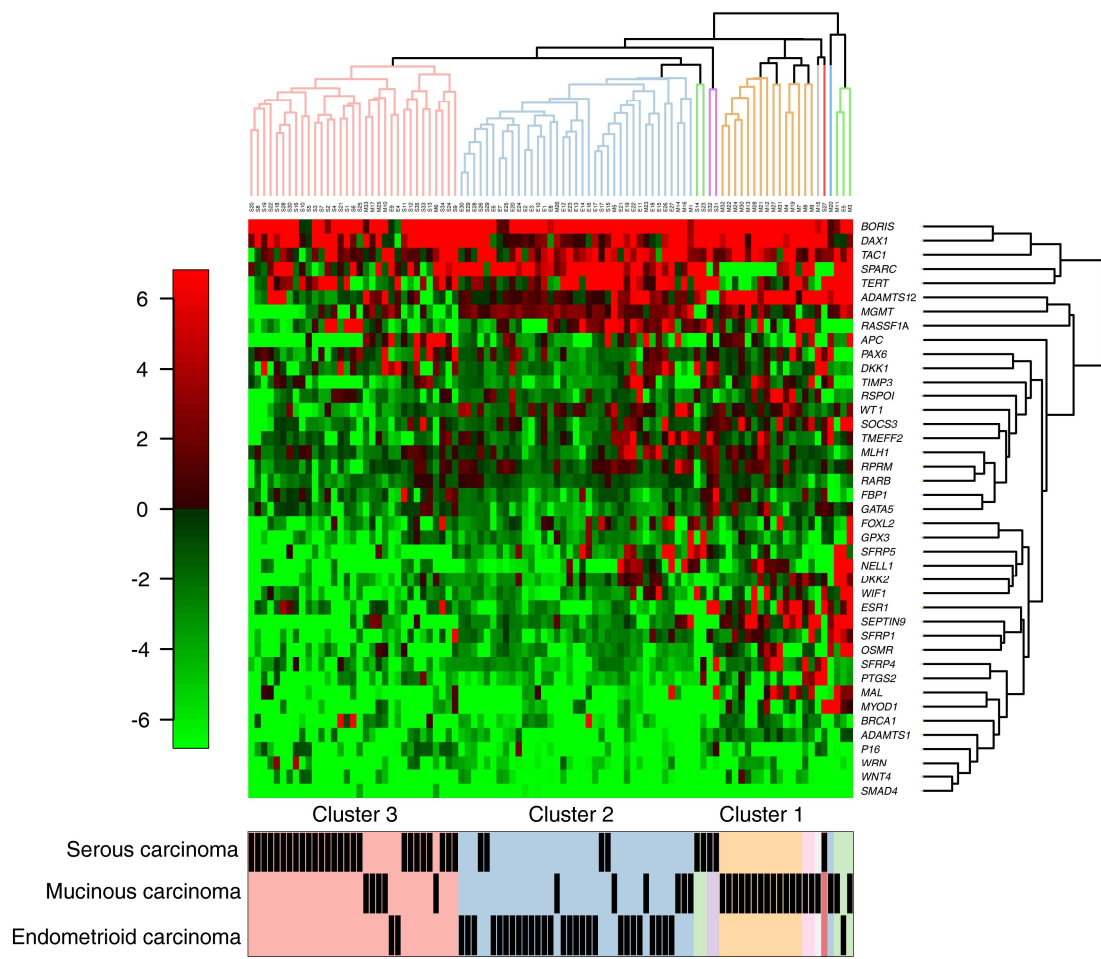

Figure S1. Heatmap\_EMS.
